# Supplementary material for: Mentha pulegium L. (Pennyroyal, Lamiaceae) Extracts Impose Abortion or Fetal-Mediated Toxicity in Pregnant Rats; Evidenced by the Modulation of Pregnancy Hormones, MiR-520, MiR-146a, TIMP-1 and MMP-9 Protein Expressions, Inflammatory State, Certain Related Signaling Pathways, and Metabolite Profiling via UPLC-ESI-TOF-MS
Source: MDPI journal article supplement (doi:10.3390/toxins14050347), 2022-05-16
Supplement: s1 [file s1]

# Supplementary Materials: *Mentha pulegium* L. (pennyroyal, Lamiaceae) extracts impose abortion or fetal-mediated toxicity in pregnant rats; evidenced by the modulation of pregnancy hormones, MiR-520, MiR-146a, TIMP-1 and MMP-9 protein expressions, inflammatory state, certain related signaling pathways, and metabolite profiling *via* UPLC-ESI-TOF-MS.

Amira A. El-Gazar, Ayat M. Emad, Ghada M. Ragab and Dalia M. Rasheed

## Identification of caffeic acid derivatives

Spectrum from IDA-210526-SM0124-1.wiff (sample 1) - IDA-210526-SM0124-1, Experiment 11, -TOF MS<sup>2</sup> (50 - 1000) from 1.307 min  
Precursor: 355.1 Da

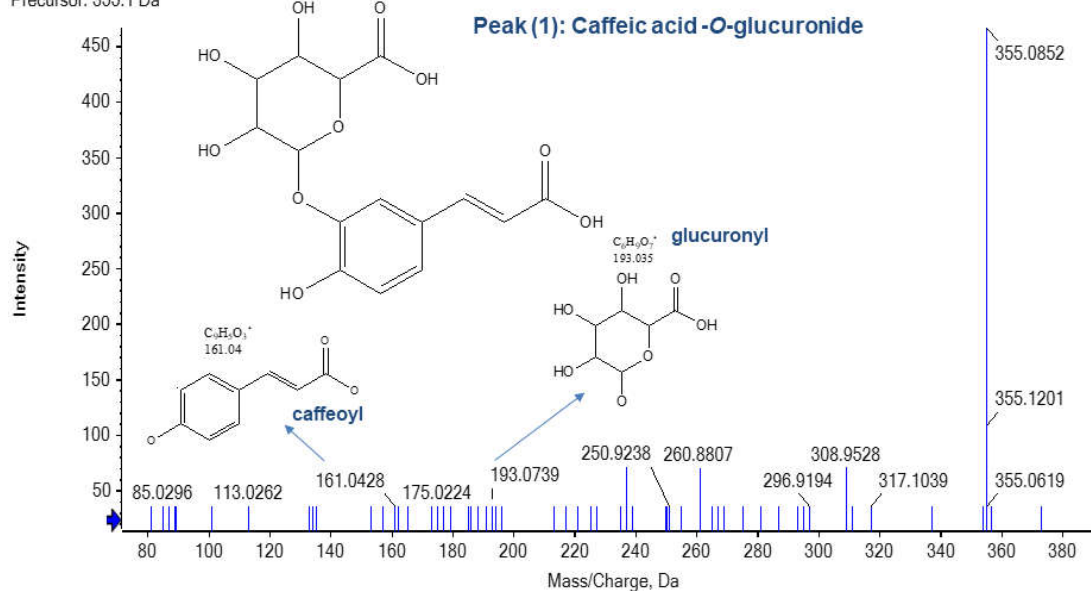

**Figure S1:** ESI-MS/MS Spectrum of peak (1) in the negative ion mode

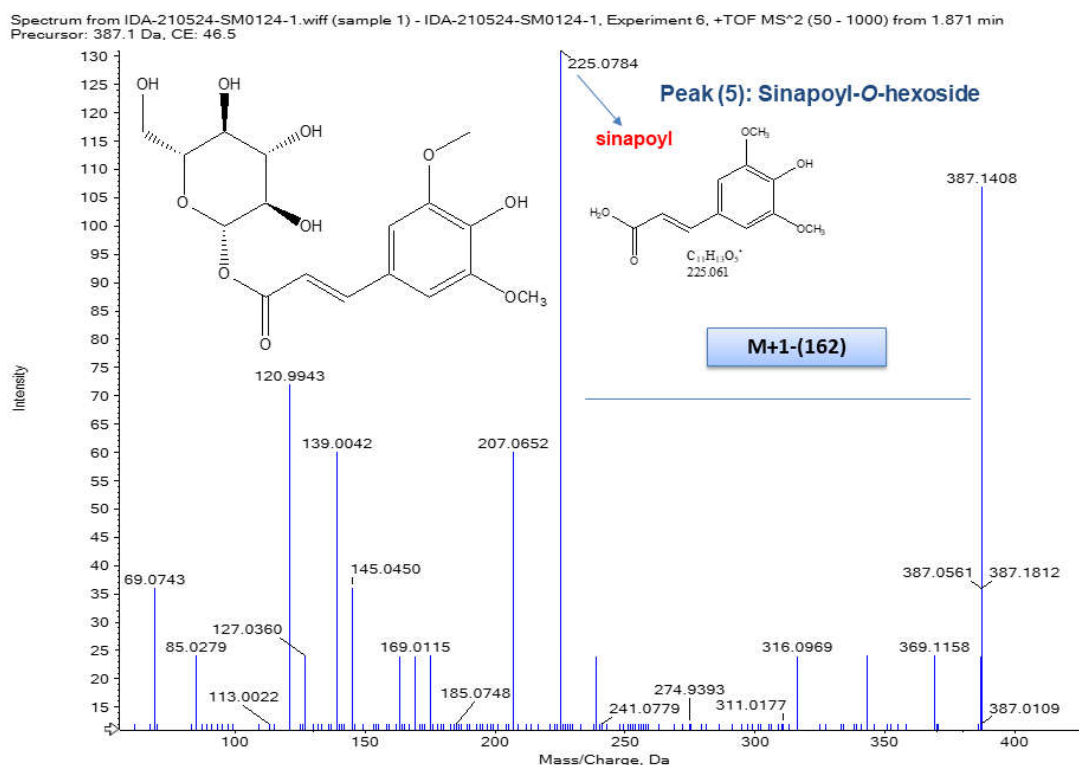

**Figure S2:** ESI-MS/MS Spectrum of peak (5) in the positive ion mode

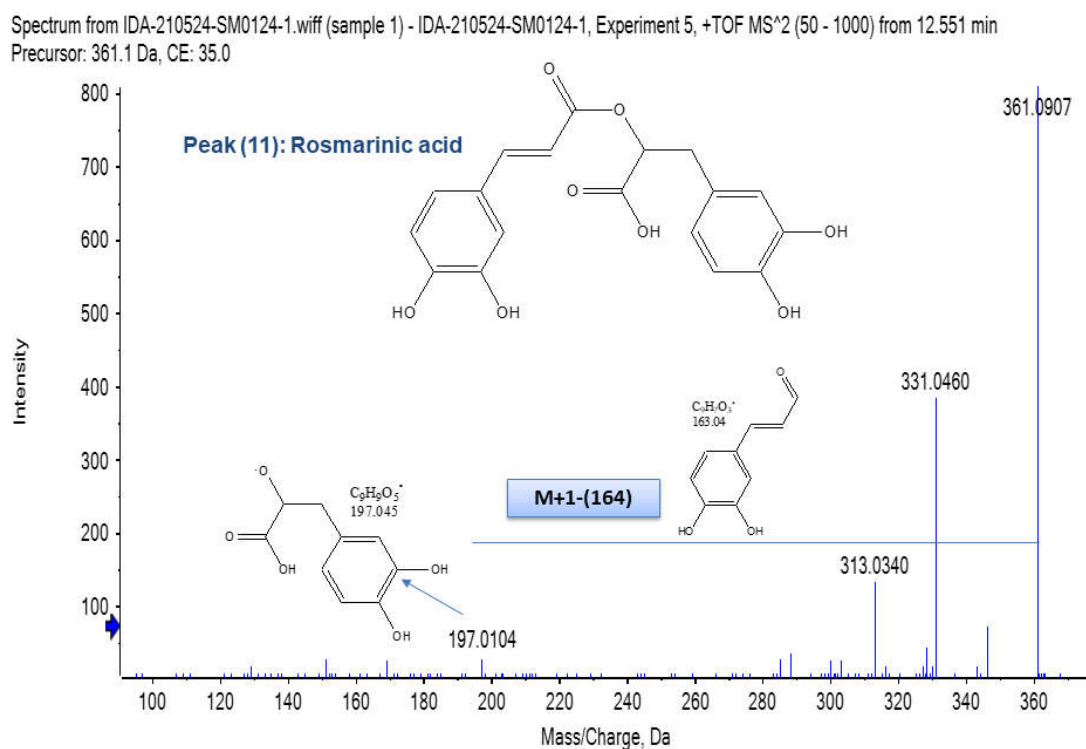

**Figure S3:** ESI-MS/MS Spectrum of peak (11) in the positive ion mode

Spectrum from IDA-210524-SM0124-1.wiff (sample 1) - IDA-210524-SM0124-1, Experiment 3, +TOF MS<sup>2</sup> (50 - 1000) from 7.256 min  
Precursor: 557.3 Da, CE: 35.0

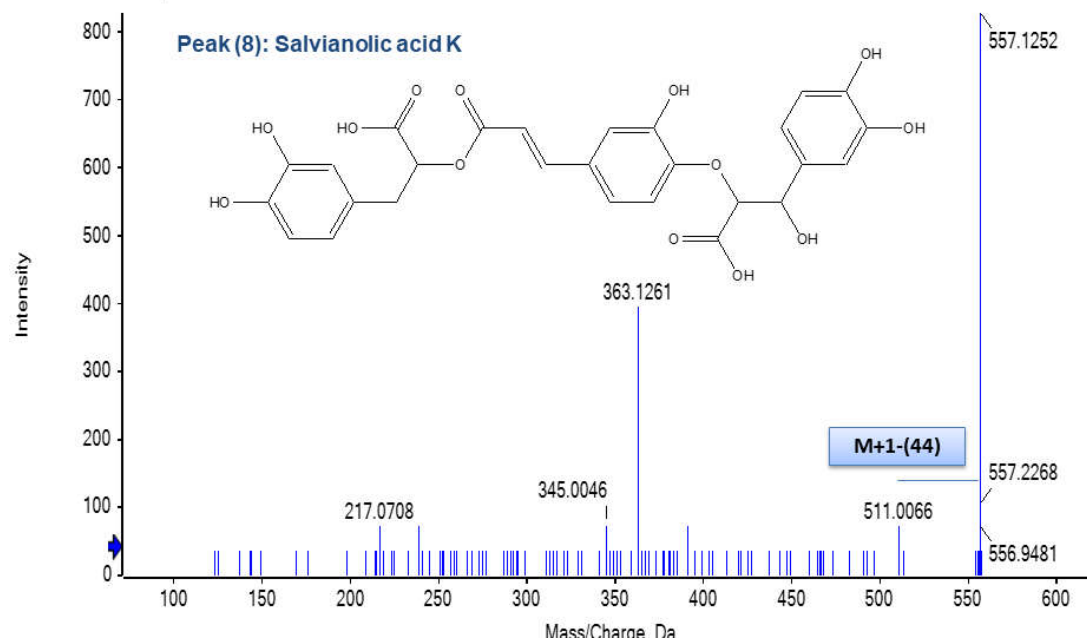**Figure S4:** ESI-MS/MS Spectrum of peak (8) in the positive ion mode

Spectrum from IDA-210524-SM0124-1.wiff (sample 1) - IDA-210524-SM0124-1, Experiment 2, +TOF MS<sup>2</sup> (50 - 1000) from 8.986 min  
Precursor: 315.1 Da, CE: 35.0

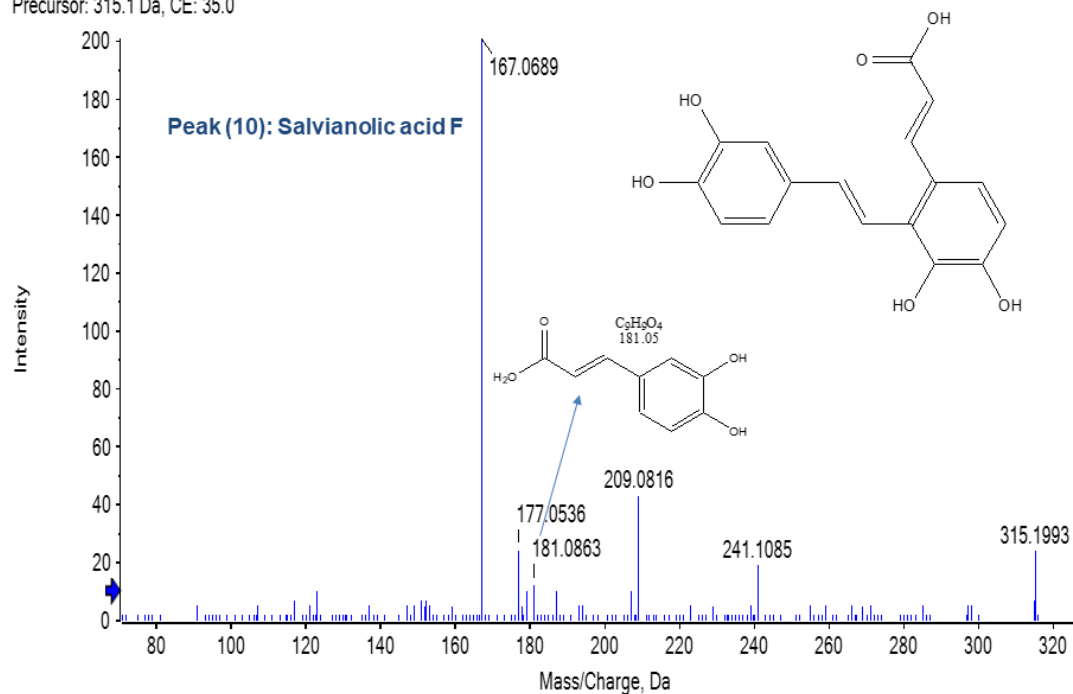

**Figure S5:** ESI-MS/MS Spectrum of peak (10) in the positive ion modeSpectrum from IDA-210526-SM0124-1.wiff (sample 1) - IDA-210526-SM0124-1, Experiment 3, -TOF MS<sup>2</sup> (50 - 1000) from 8.825 min

Precursor: 559.1 Da

**Peak (9): 3-Caffeoyl-4-sinapoylquinic acid**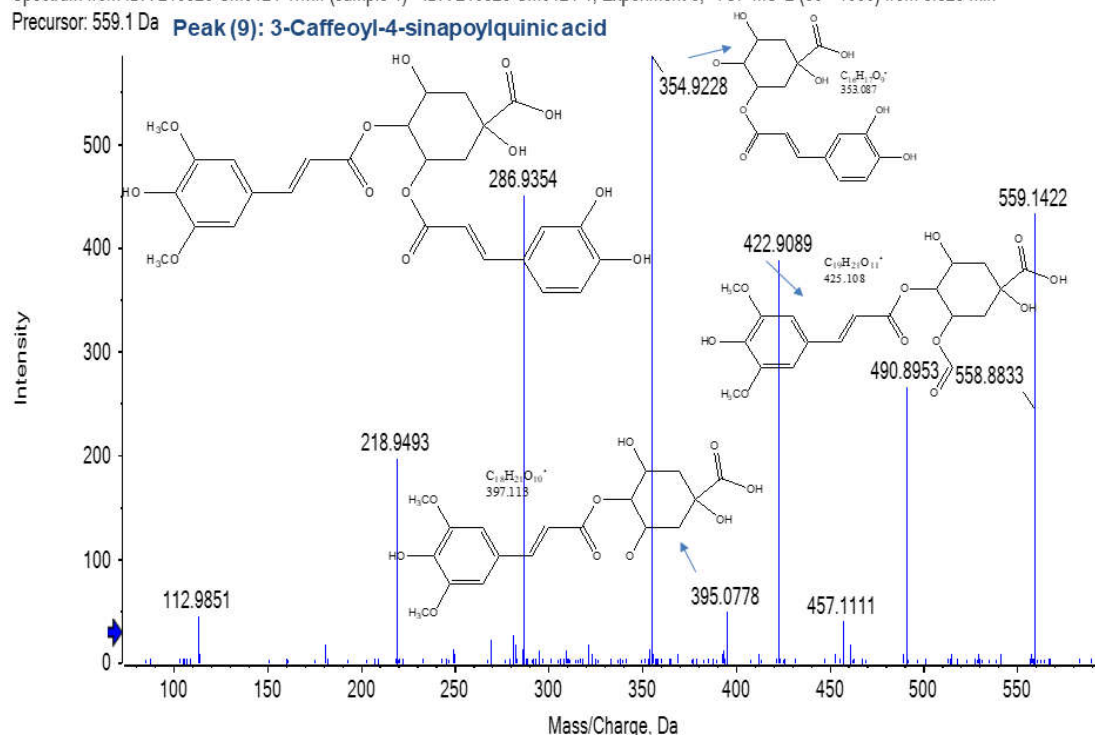**Figure S6:** ESI-MS/MS Spectrum of peak (9) in the negative ion mode**Identification of Flavones and derivatives**

Spectrum from IDA-210526-SM0124-1.wiff (sample 1) - IDA-210526-SM0124-1, Experiment 6, -TOF MS<sup>2</sup> (50 - 1000) from 4.872 min  
Precursor: 593.2 Da

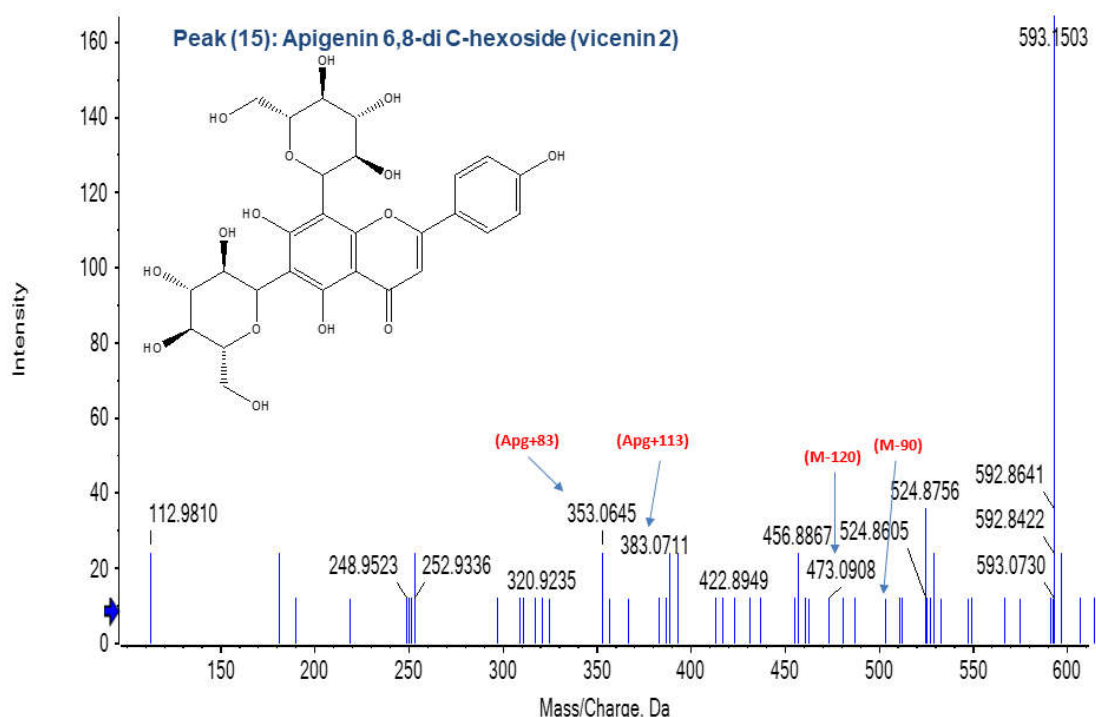

**Figure S7:** ESI-MS/MS Spectrum of peak (15) in the negative ion mode

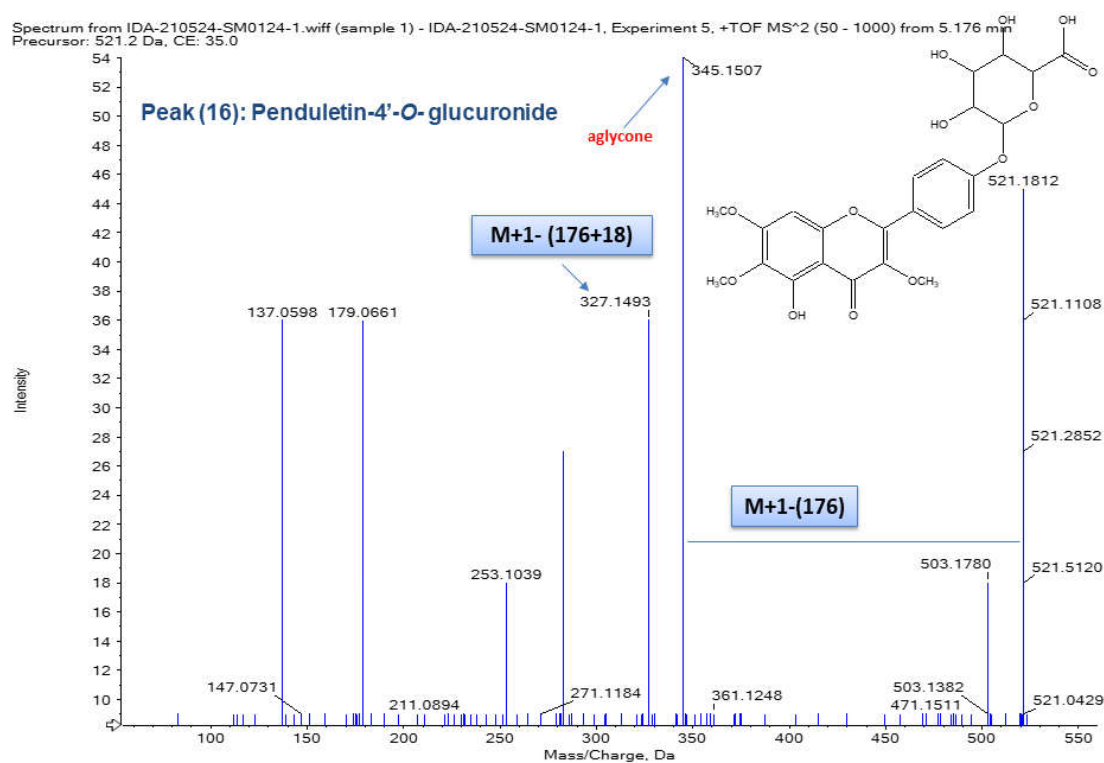

**Figure S8:** ESI-MS/MS Spectrum of peak (16) in the positive ion mode

Spectrum from IDA-210524-SM0124-1.wiff (sample 1) - IDA-210524-SM0124-1, Experiment 2, +TOF MS<sup>2</sup> (50 - 1000) from 7.846 min  
Precursor: 463.1 Da, CE: 35.0

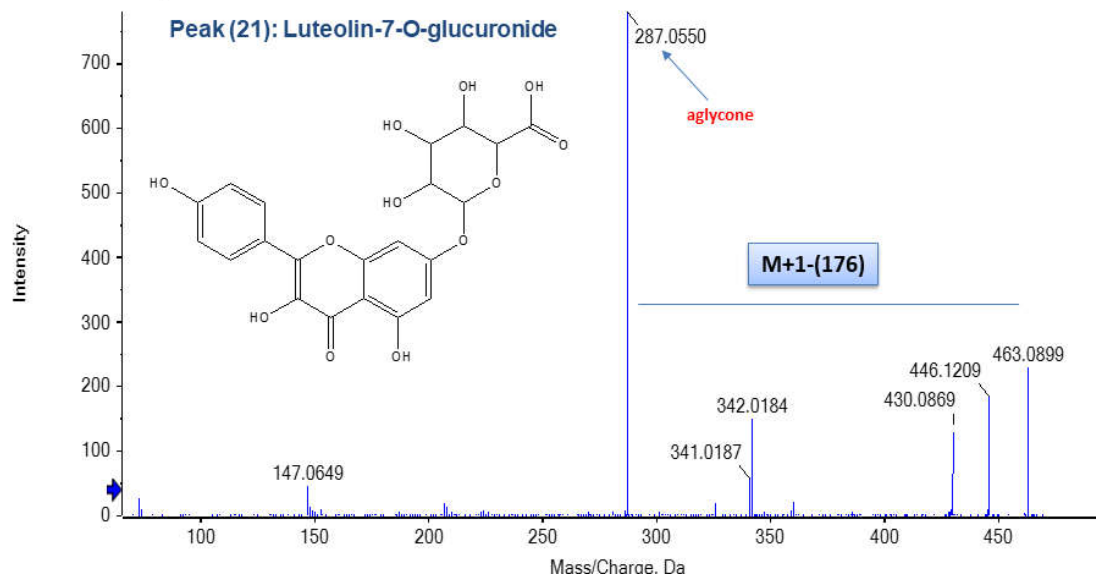**Figure S9:** ESI-MS/MS Spectrum of peak (21) in the positive ion mode

Spectrum from IDA-210524-SM0124-1.wiff (sample 1) - IDA-210524-SM0124-1, Experiment 2, +TOF MS<sup>2</sup> (50 - 1000) from 8.520 min  
Precursor: 447.1 Da, CE: 35.0

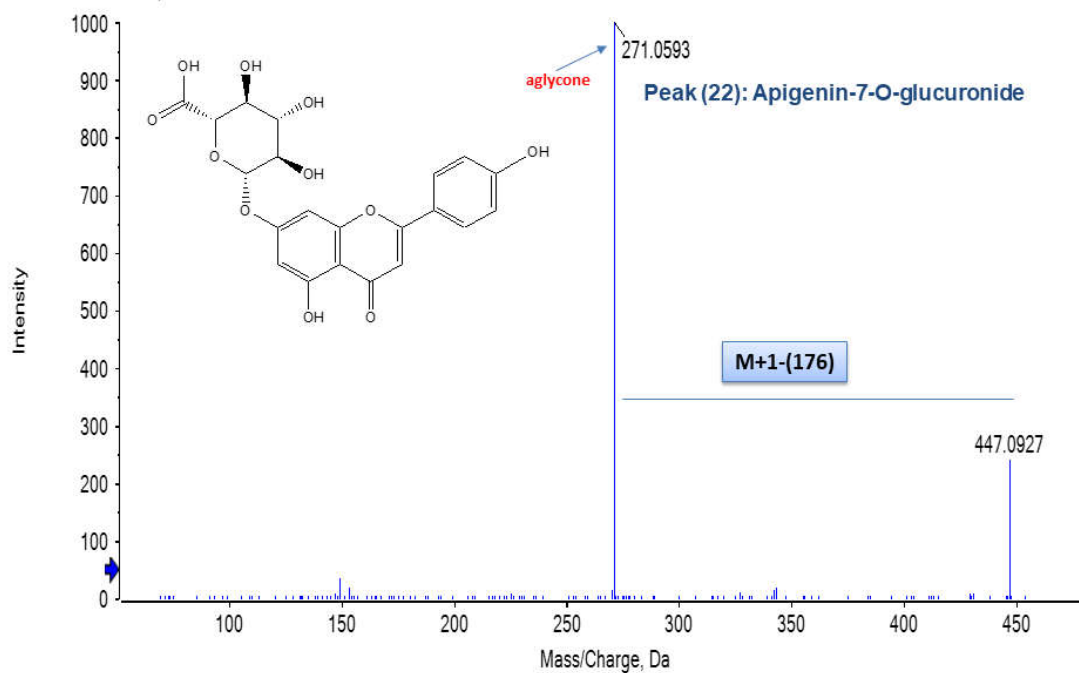**Figure S10:** ESI-MS/MS Spectrum of peak (22) in the positive ion mode

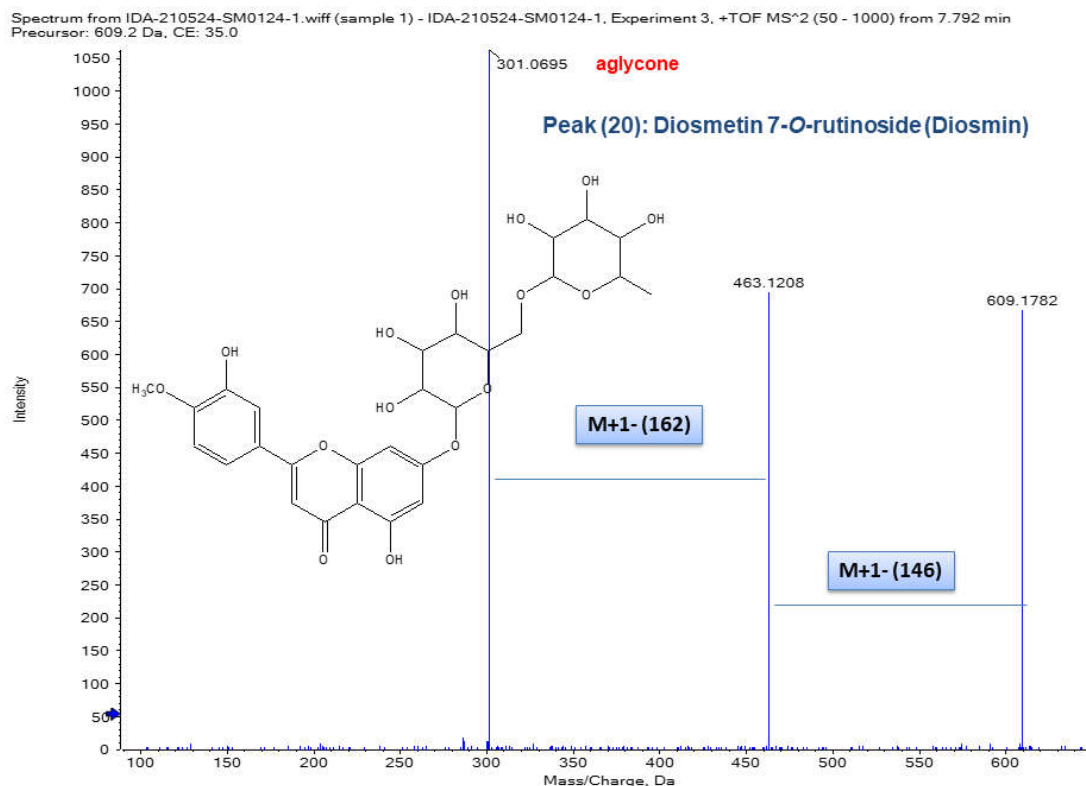

**Figure S11:** ESI-MS/MS Spectrum of peak (20) in the positive ion mode

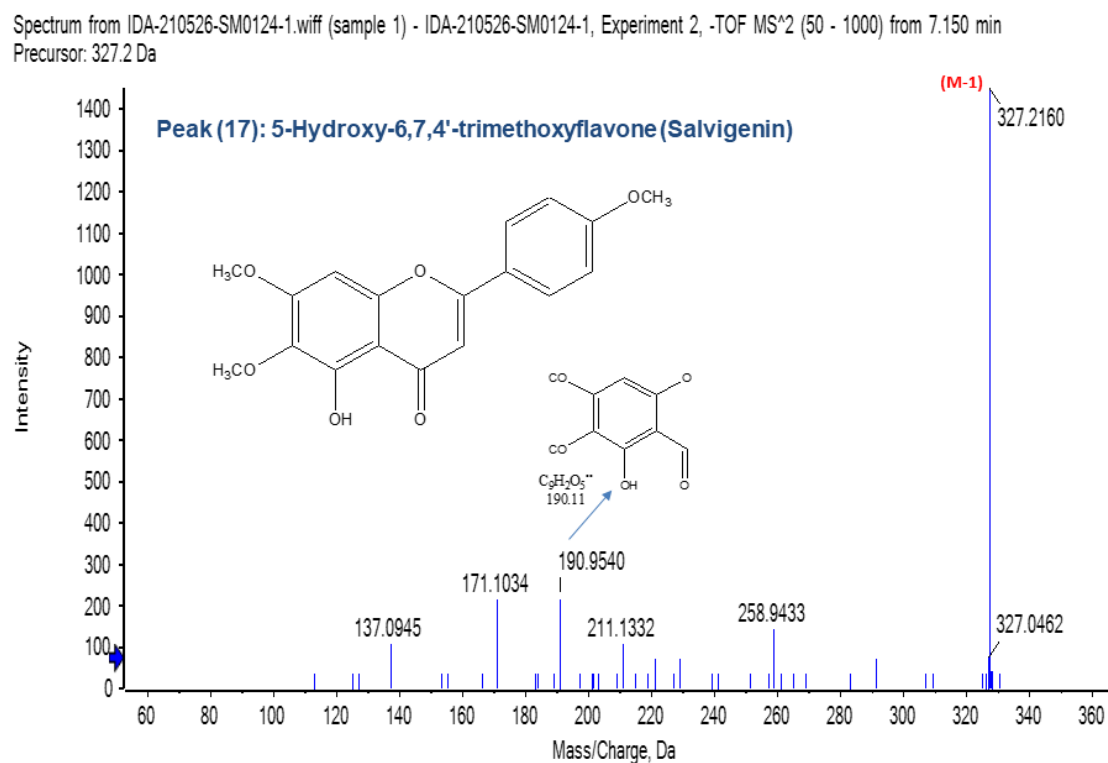

**Figure S12:** ESI-MS/MS Spectrum of peak (17) in the negative ion mode

Spectrum from IDA-210524-SM0124-1.wiff (sample 1) - IDA-210524-SM0124-1, Experiment 2, +TOF MS<sup>2</sup> (50 - 1000) from 14.233 min  
Precursor: 285.1 Da, CE: 35.0

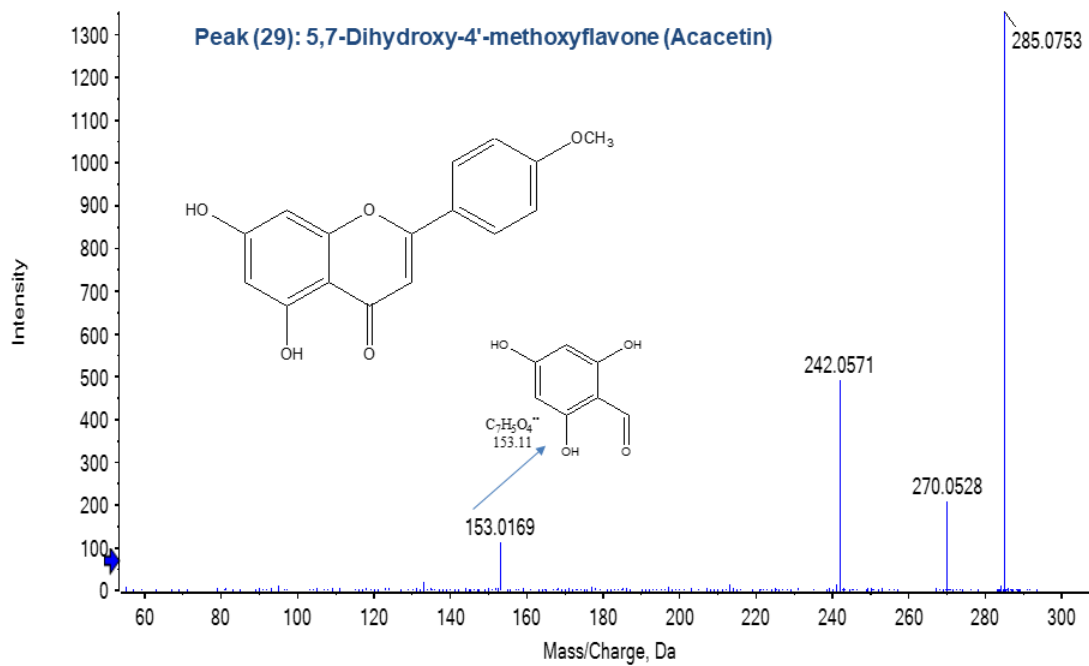**Figure S13:** ESI-MS/MS Spectrum of peak (29) in the positive ion mode



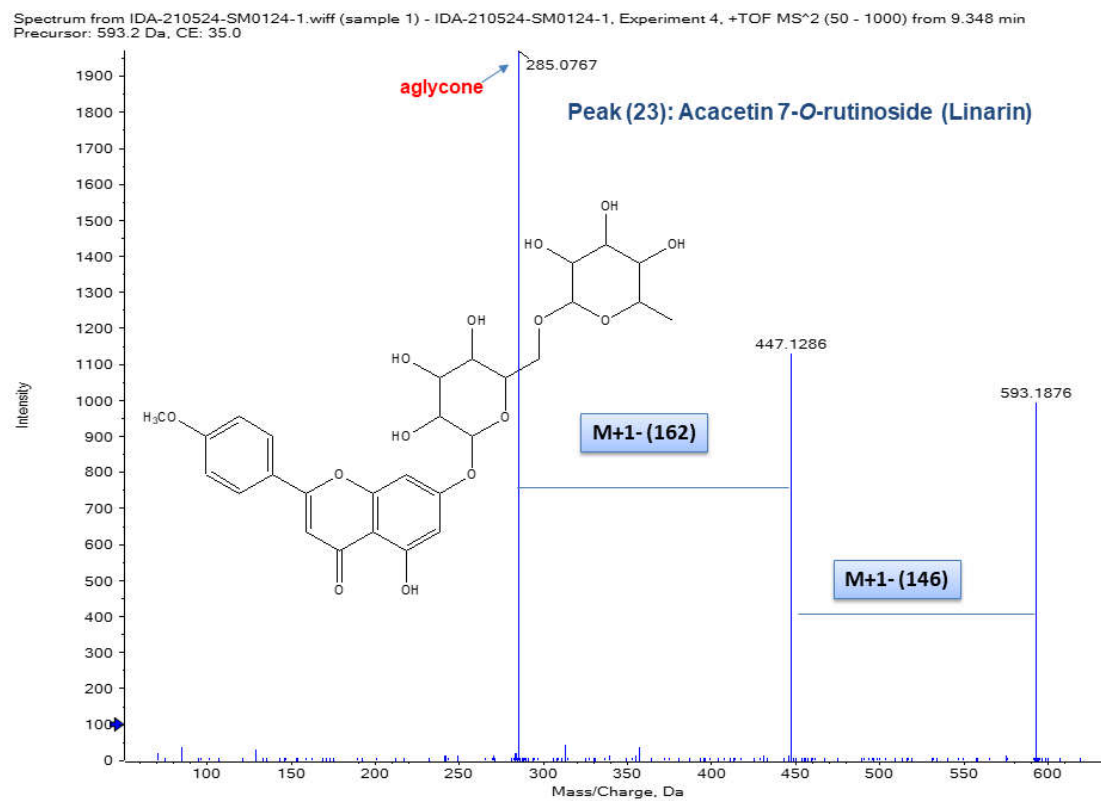

**Figure S14:** ESI-MS/MS Spectrum of peak (23) in the positive ion mode

#### Identification of Flavanone & Flavanol derivatives

Spectrum from IDA-210524-SM0124-1.wiff (sample 1) - IDA-210524-SM0124-1, Experiment 3, +TOF MS<sup>2</sup> (50 - 1000) from 5.067 min  
Precursor: 449.1 Da, CE: 35.0

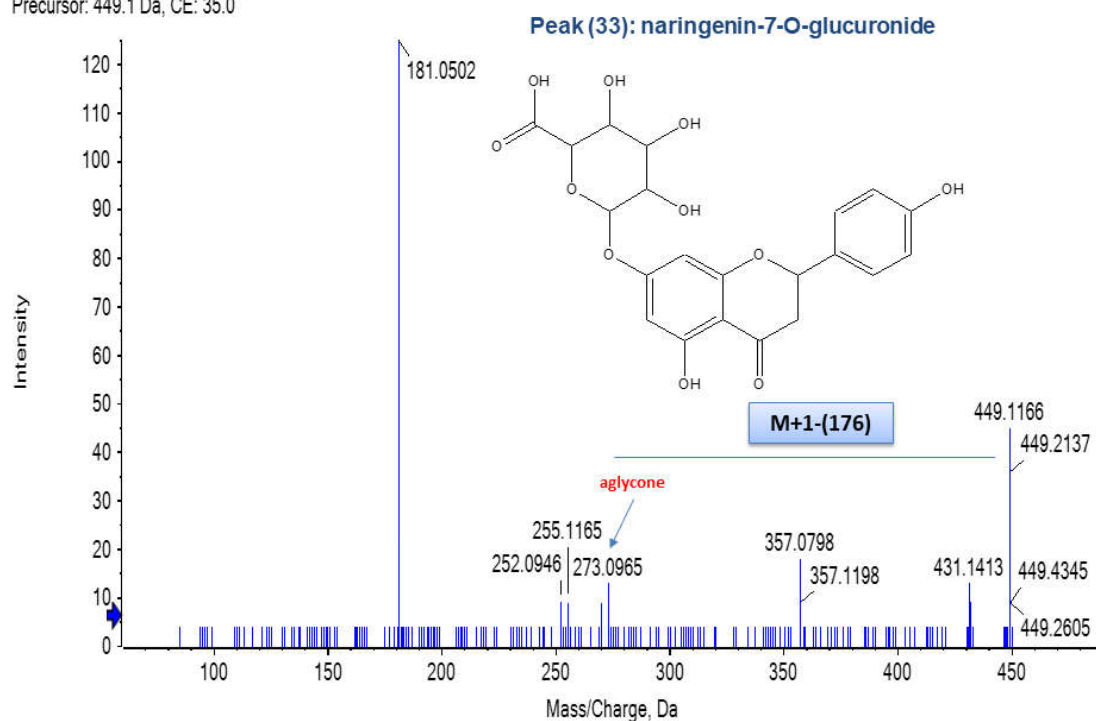

**Figure S15:** ESI-MS/MS Spectrum of peak (33) in the positive ion mode

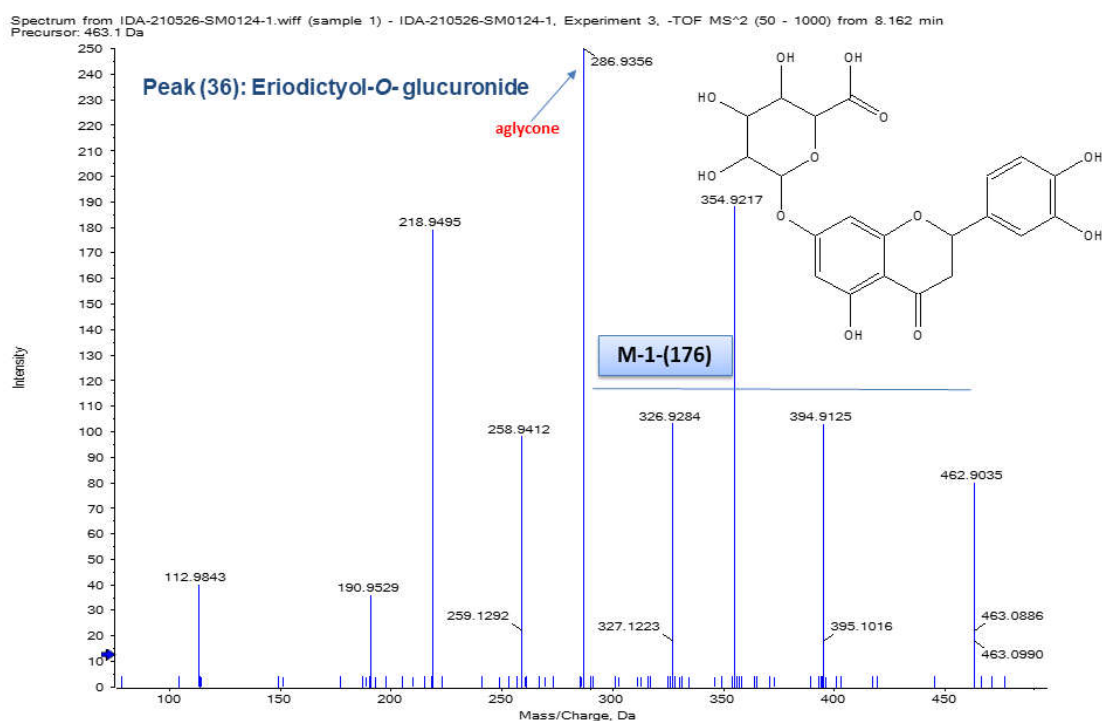

**Figure S16:** ESI-MS/MS Spectrum of peak (36) in the negative ion mode

Spectrum from IDA-210524-SM0124-1.wiff (sample 1) - IDA-210524-SM0124-1, Experiment 4, +TOF MS<sup>2</sup> (50 - 1000) from 21.512 min  
Precursor: 611.3 Da, CE: 35.0

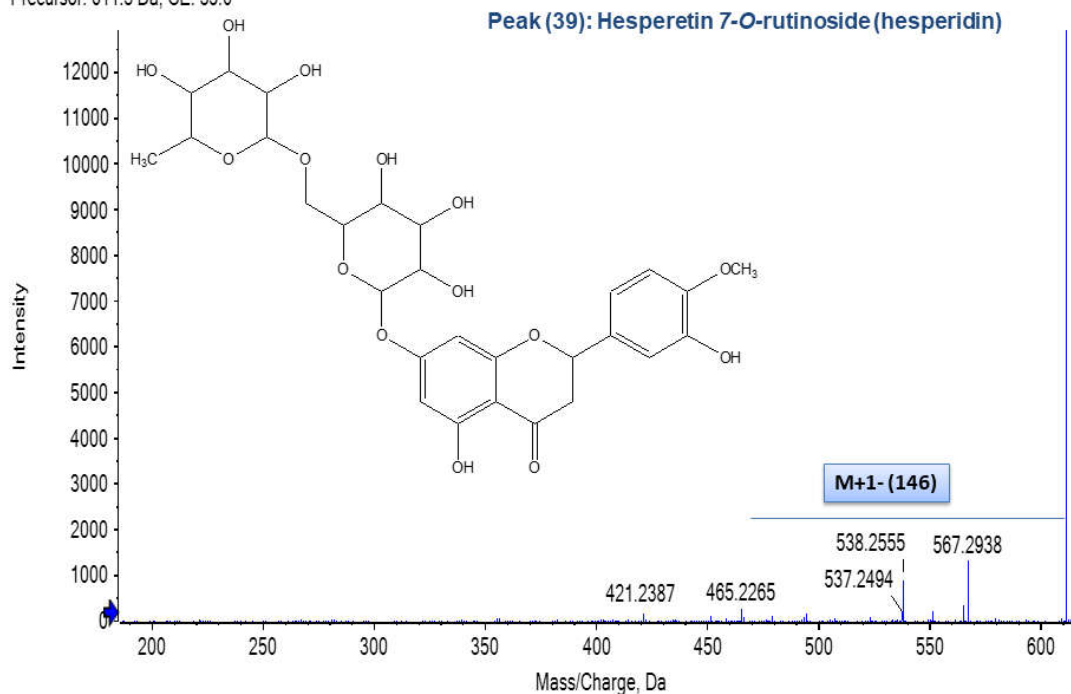**Figure S17:** ESI-MS/MS Spectrum of peak (39) in the positive ion mode**Identification of prenyl flavones**

Spectrum from IDA-210526-SM0124-1.wiff (sample 1) - IDA-210526-SM0124-1, Experiment 2, -TOF MS<sup>2</sup> (50 - 1000) from 7.238 min  
Precursor: 353.2 Da

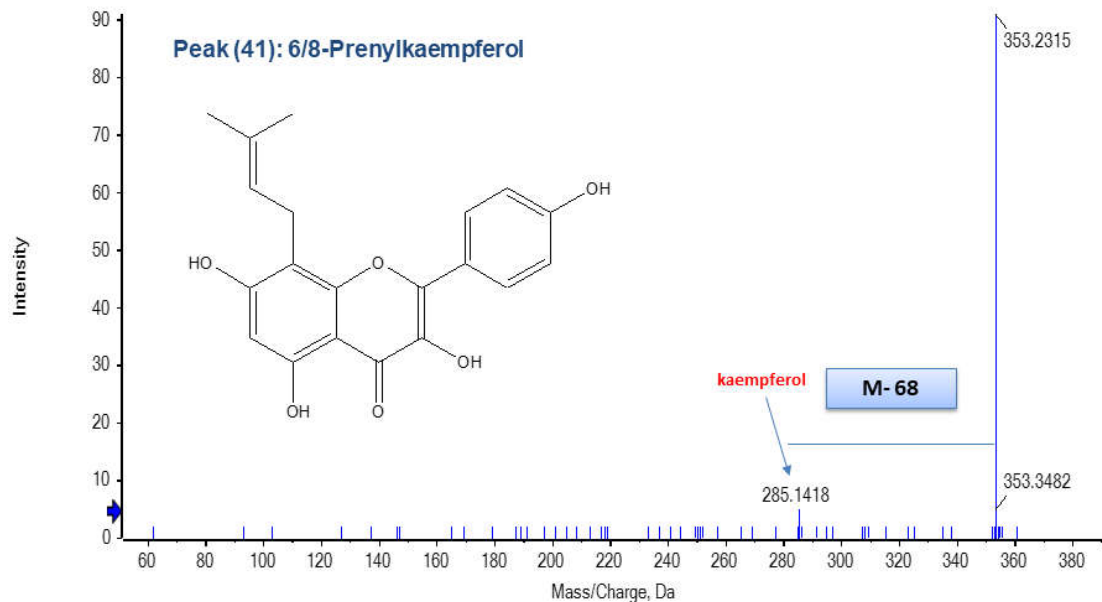

**Figure S18:** ESI-MS/MS Spectrum of peak (41) in the negative ion mode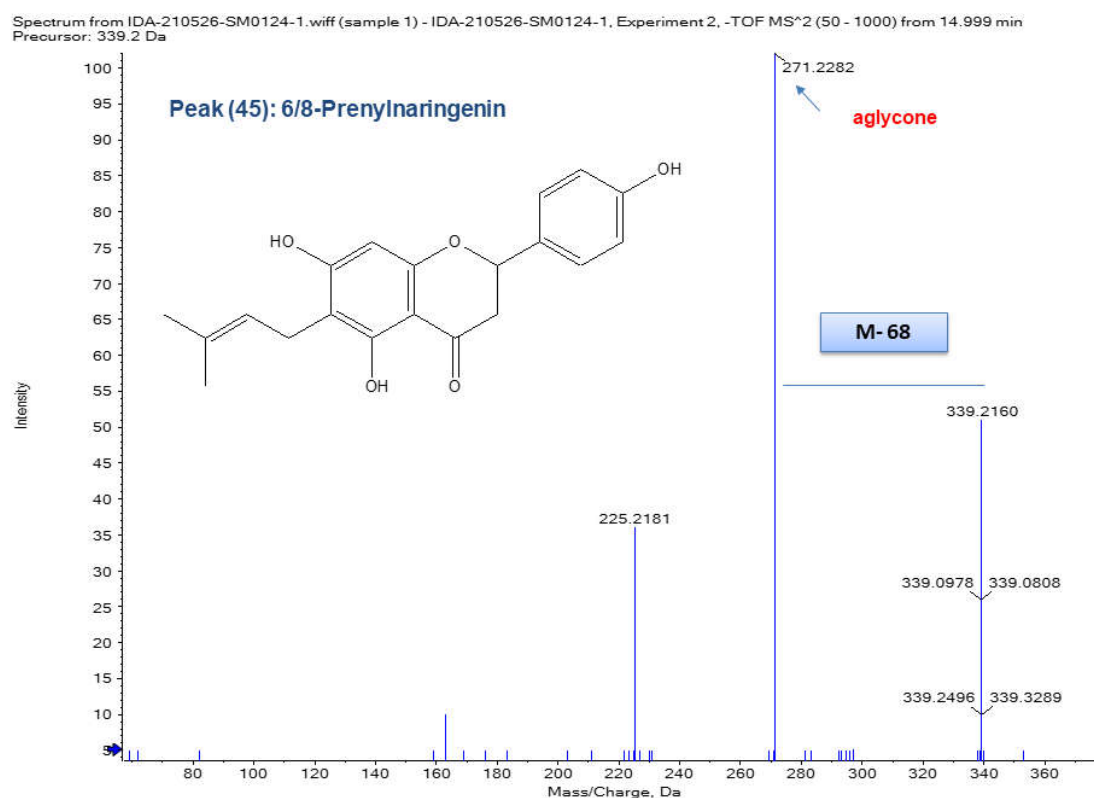**Figure S19:** ESI-MS/MS Spectrum of peak (45) in the negative ion mode**Identification of bioflavonoids**

Spectrum from IDA-210524-SM0124-1.wiff (sample 1) - IDA-210524-SM0124-1, Experiment 3, +TOF MS<sup>2</sup> (50 - 1000) from 18.879 min  
Precursor: 567.1 Da, CE: 35.0

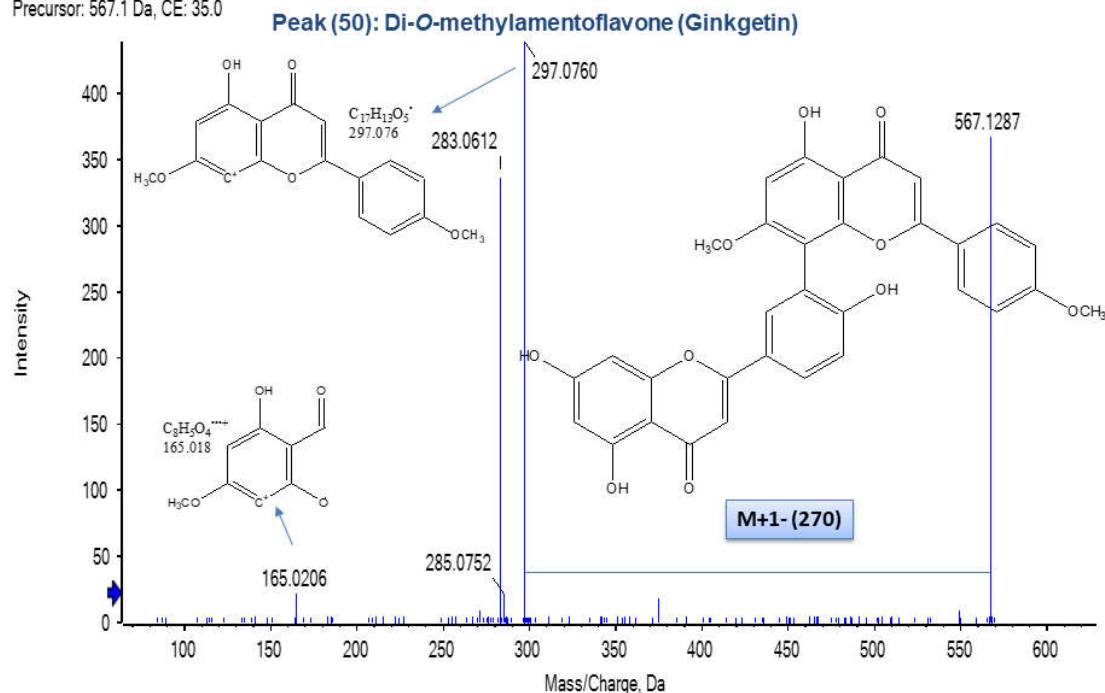

**Figure S20:** ESI-MS/MS Spectrum of peak (50) in the positive ion mode

Spectrum from IDA-210524-SM0124-1.wiff (sample 1) - IDA-210524-SM0124-1, Experiment 3, +TOF MS<sup>2</sup> (50 - 1000) from 21.585 min  
Precursor: 581.1 Da, CE: 35.0

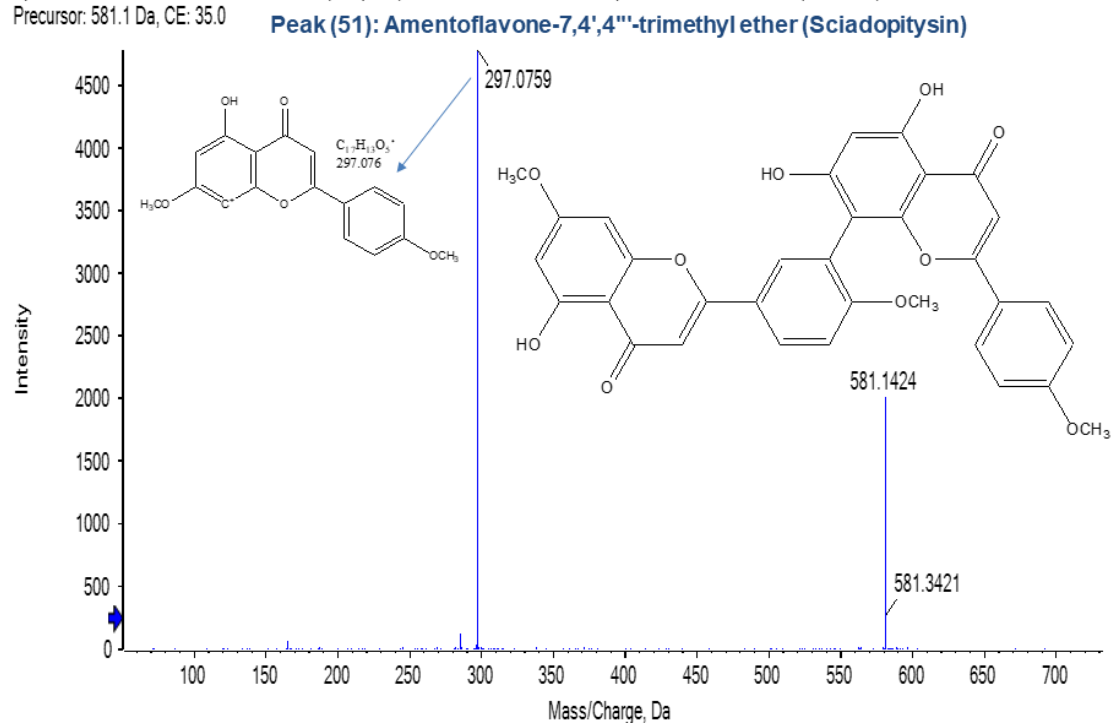

**Figure S21:** ESI-MS/MS Spectrum of peak (51) in the positive ion mode

### Identification of diterpenes

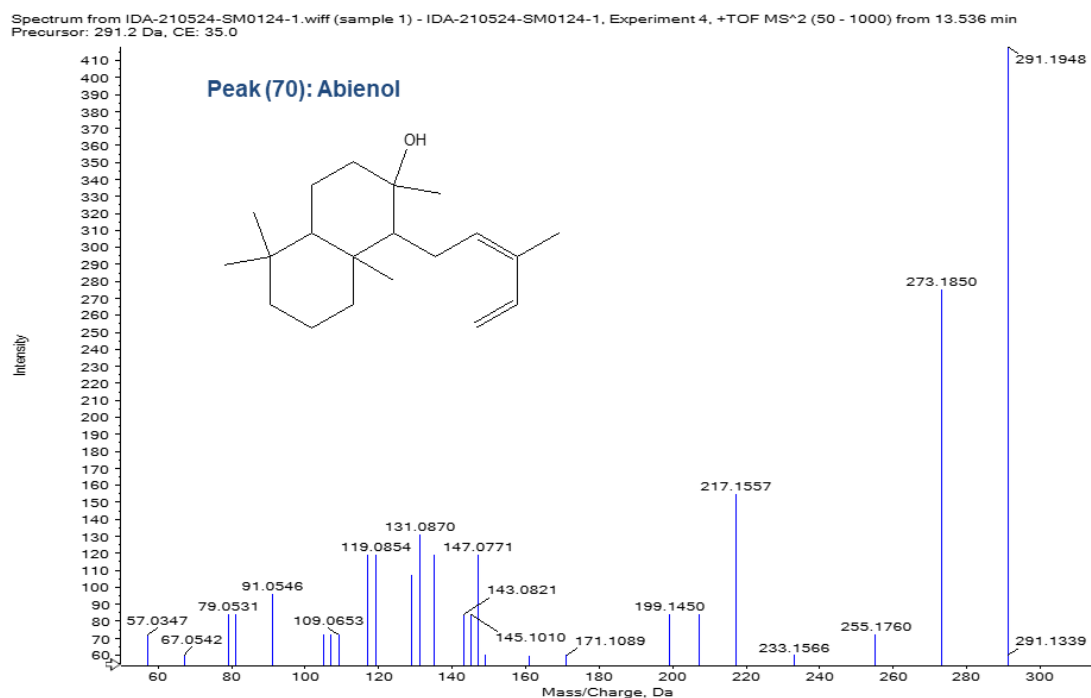

**Figure S22:** ESI-MS/MS Spectrum of peak (70) in the positive ion mode

Spectrum from IDA-210526-SM0124-1.wiff (sample 1) - IDA-210526-SM0124-1, Experiment 6, -TOF MS<sup>2</sup> (50 - 1000) from 18.934 min  
Precursor: 409.3 Da

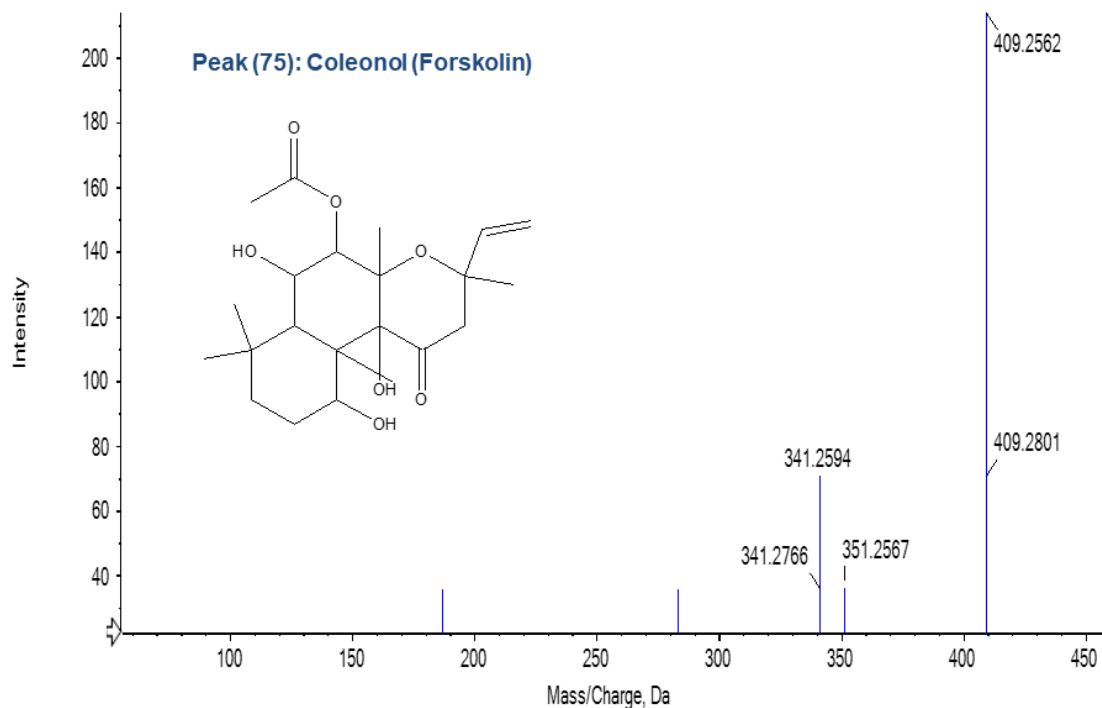

**Figure S23:** ESI-MS/MS Spectrum of peak (75) in the negative ion mode

Spectrum from IDA-210524-SM0124-1.wiff (sample 1) - IDA-210524-SM0124-1, Experiment 6, +TOF MS<sup>2</sup> (50 - 1000) from 13.332 min  
Precursor: 333.2 Da, CE: 46.5

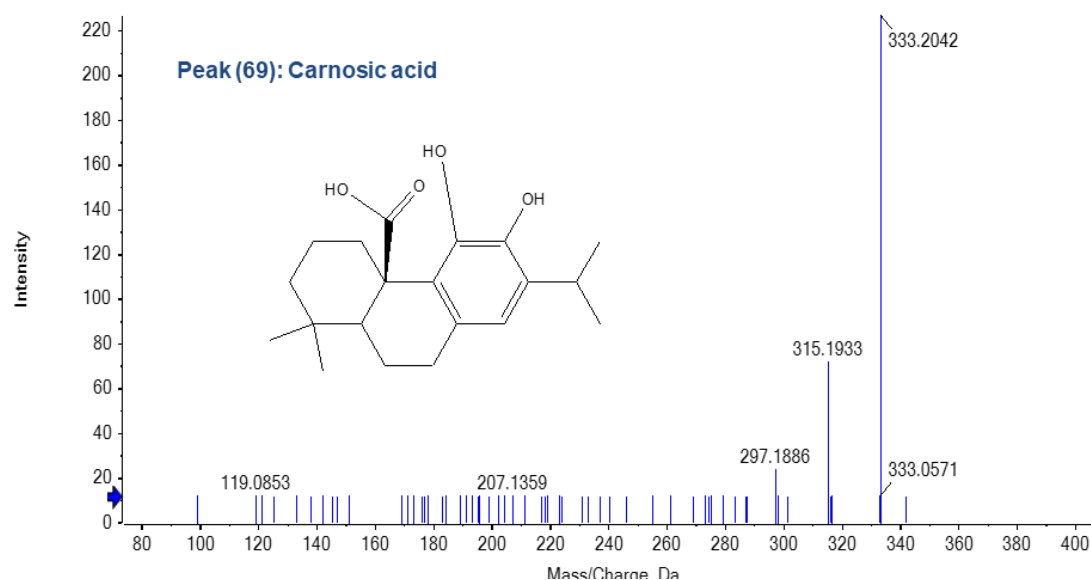**Figure S24:** ESI-MS/MS Spectrum of peak (69) in the positive ion mode

Spectrum from IDA-210524-SM0124-1.wiff (sample 1) - IDA-210524-SM0124-1, Experiment 3, +TOF MS<sup>2</sup> (50 - 1000) from 13.876 min  
Precursor: 331.2 Da, CE: 35.0

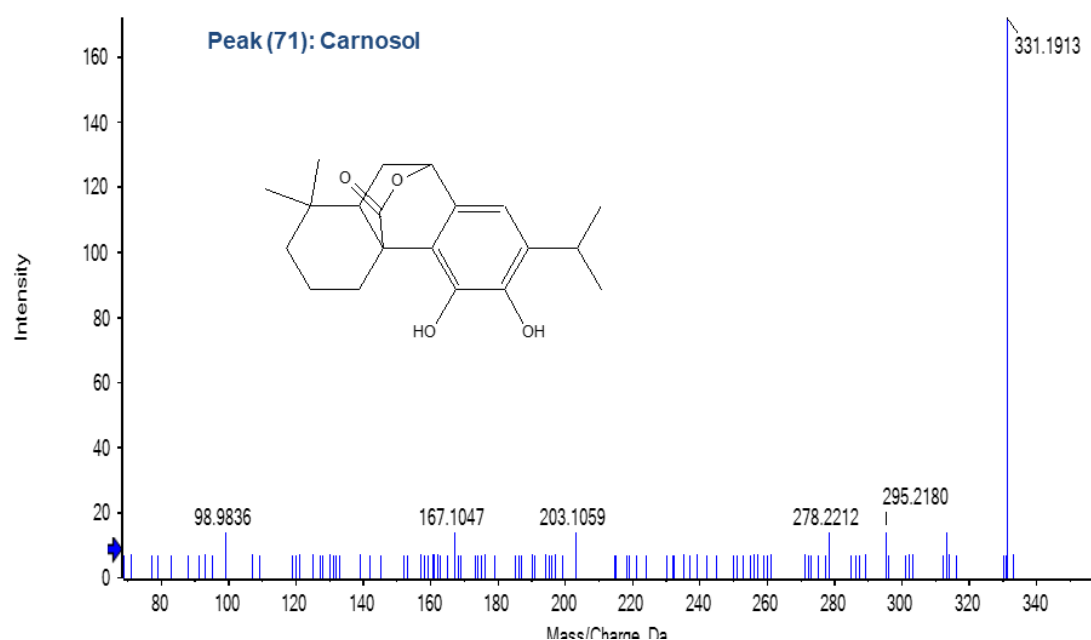**Figure S25:** ESI-MS/MS Spectrum of peak (71) in the positive ion mode

Spectrum from IDA-210524-SM0124-1.wiff (sample 1) - IDA-210524-SM0124-1, Experiment 2, +TOF MS<sup>2</sup> (50 - 1000) from 19.006 min  
Precursor: 317.2 Da, CE: 35.0

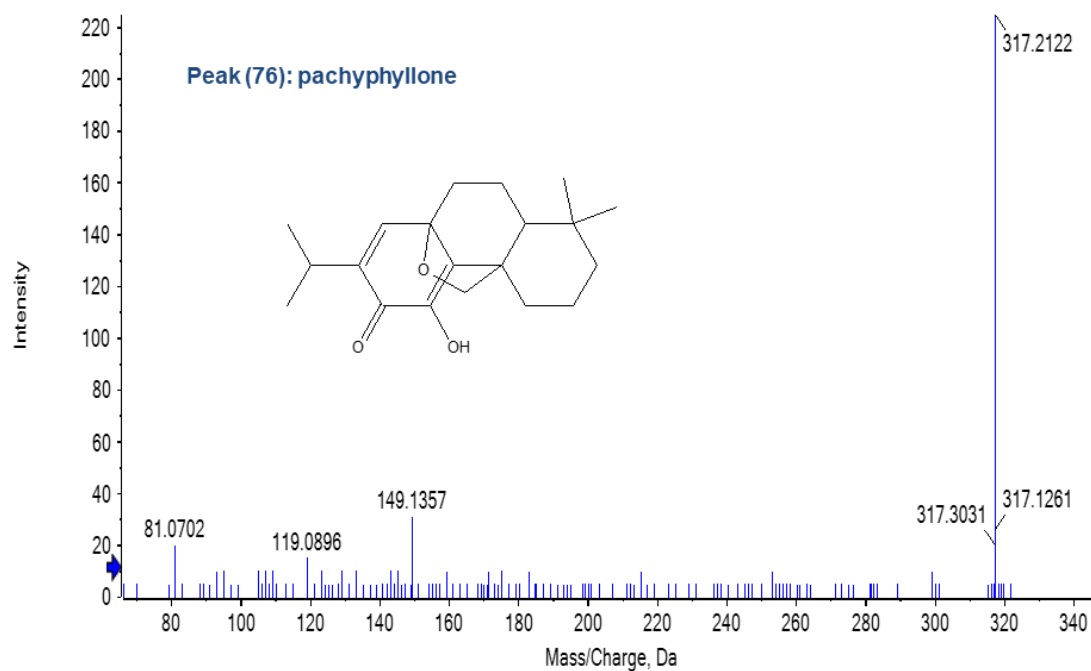

**Figure S26:** ESI-MS/MS Spectrum of peak (76) in the positive ion mode

Spectrum from IDA-210524-SM0124-1.wiff (sample 1) - IDA-210524-SM0124-1, Experiment 4, +TOF MS<sup>2</sup> (50 - 1000) from 24.914 min  
Precursor: 279.2 Da, CE: 35.0

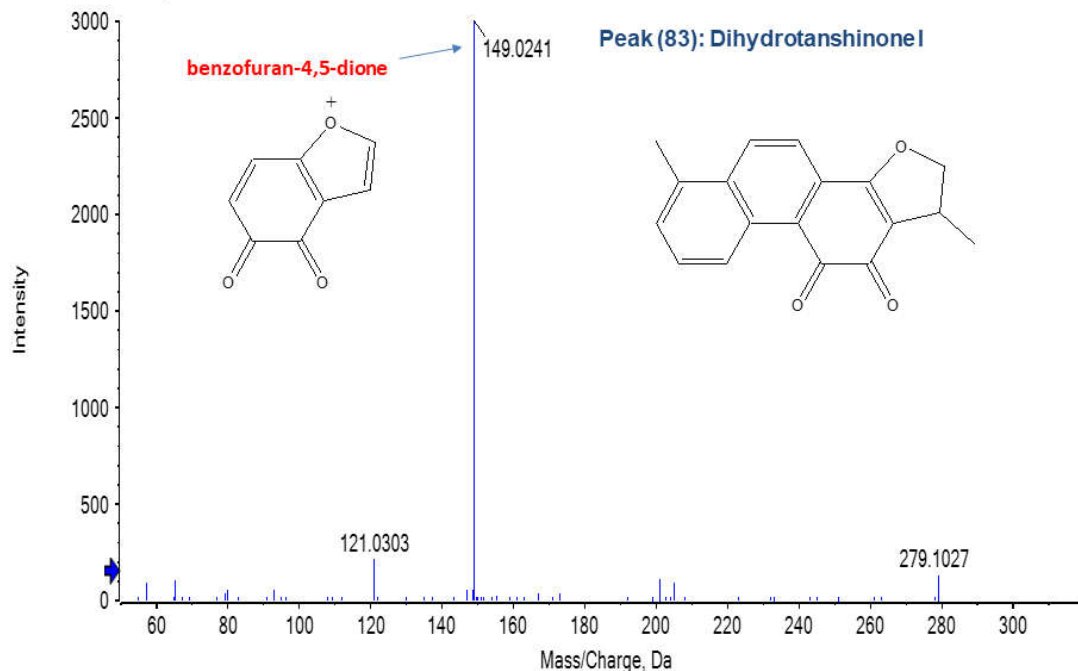

**Figure S27:** ESI-MS/MS Spectrum of peak (83) in the positive ion mode



### Identification of triterpenes

Spectrum from IDA-210524-SM0124-1.wiff (sample 1) - IDA-210524-SM0124-1, Experiment 5, +TOF MS<sup>2</sup> (50 - 1000) from 17.224 min  
Precursor: 489.4 Da, CE: 35.0

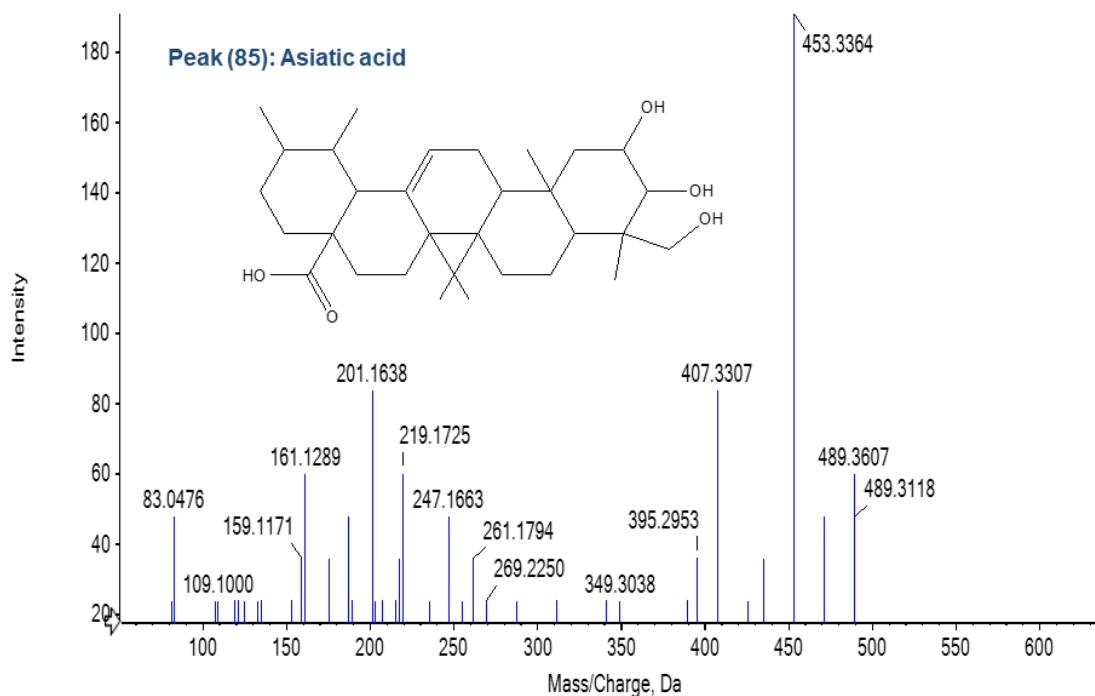

**Figure S28:** ESI-MS/MS Spectrum of peak (85) in the positive ion mode

Spectrum from IDA-210524-SM0124-1.wiff (sample 1) - IDA-210524-SM0124-1, Experiment 4, +TOF MS<sup>2</sup> (50 - 1000) from 23.248 min  
Precursor: 457.4 Da, CE: 35.0

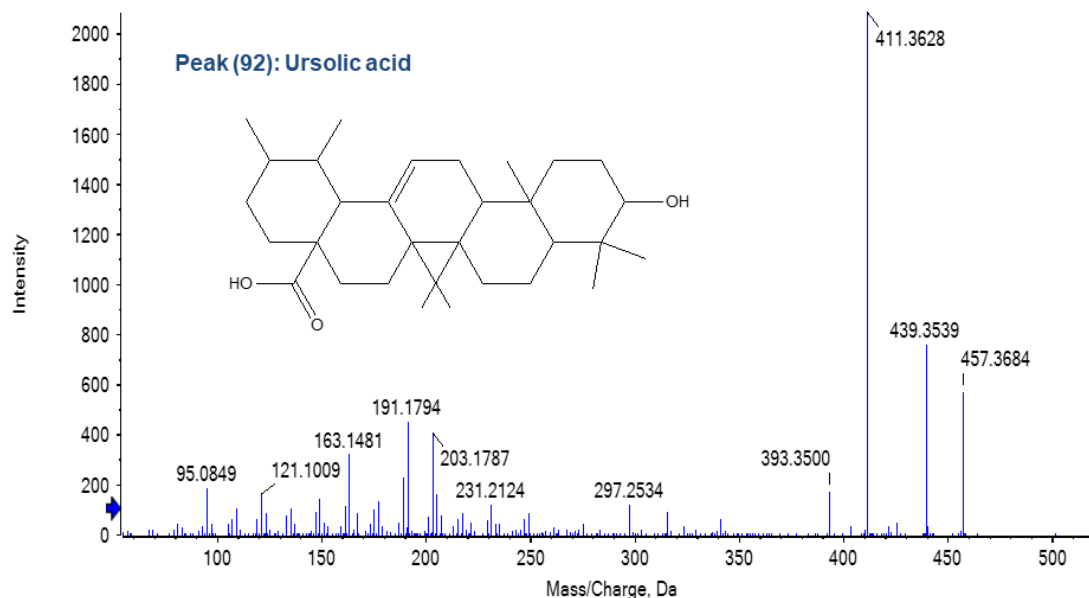

**Figure S29:** ESI-MS/MS Spectrum of peak (92) in the positive ion mode.

**Table S1.** The PCR primers used for quantitative PCR analysis.

|                  |                                                                      |
|------------------|----------------------------------------------------------------------|
| <b>MiR -520</b>  | <b>F: GGCACAAAGTGCTTCCTTTTA</b><br><b>R: TATGGTTTTGACGACTGTGTGAT</b> |
| <b>MiR -146a</b> | F: 5'- CTGAGAACTGAATTCCA -3'<br>R: 5'- GAG CAG GCT GGA GAA -3'       |
| <b>U6</b>        | F: ATTGGAACGATACAGAGAAGATT<br>R: GGAACGCTTCACGAATTG                  |
